# Supplementary material for: Evaluation of female university students’ knowledge, attitudes, and practices toward human papillomavirus infection and vaccination. Multicenter cross-sectional study
Source: PubMed Central journal article supplement — BMC Womens Health. 2024 Aug 1;24:437. doi: 10.1186/s12905-024-03279-6 (PMC11293142; doi:10.1186/s12905-024-03279-6), 2024-08-01
Supplement: 12905_2024_3279_MOESM1_ESM.pdf [file 12905_2024_3279_MOESM1_ESM.pdf]

## Supplementary File: Study Questionnaire

### Evaluation of Female University Students' Knowledge, attitudes, and Practices Toward Human Papillomavirus Infection and Vaccination; Multicenter Cross-sectional Study

#### **PART I: Sociodemographic characteristics**

1. Age in years -----
2. Sex -----
3. Religion-----
  - A. Orthodox
  - B. Muslim
  - C. Catholic
  - D. Protestant
4. Place of birth.....
  - A. Urban
  - B. Rural
5. Department.....
  - A. Pharmacy
  - B. Nursing
  - C. Midwifery
  - D. Medical laboratory
6. Undergraduate year.....
  - A. Year 1
  - B. Year 2
  - C. Year 3
  - D. Year 4
  - E. Year 5
7. Are you in a sexual relationship?
  - A. Yes
  - B. No
8. Number of sexual partners in the past year
  - A. None
  - B. One
  - C. Two or more
9. If sexually active, how often do you use contraceptives?
  - A. Always
  - B. Sometimes
10. What kind of contraceptives do you use?
  - A. Condoms
  - B. Oral contraceptives
  - C. Others
11. Have you tested for STI in the past 6 months?
  - A. Yes
  - B. No

12. Have you been treated for STI in the past 6 months?

A. Yes

B. No

13. Family history of cervical cancer

A. Yes

B. No

## **PART II: knowledge evaluation questions**

1. Heard of Human papillomavirus (HPV)?

A. Yes

B. No

2. What is your source of information about HPV? (more than one answer is possible)

A. Healthcare providers

D. Friends & Family

B. Internet

E. Parents

C. Mass media

3. Transmission of HPV infection. (more than one answer is possible)

A. Men only

C. both men and women

B. Women only

4. Which one is/are an HPV-associated disease? (more than one answer is possible)

A. Cervical cancer

E. Oropharyngeal cancer

B. Genital warts

F. Urinary tract infection

C. Anal cancer

G. I do not know

D. Penile cancer

5. Which one is/are the Risk factor for HPV infection? (more than one answer is possible)

A. Unprotected sex with partners

D. Multiple sex partners

B. Multiple sexual partners

E. Sexual intercourse at an early age

C. High frequency of sex partner exchange

6. Which one is /are used for the prevention of HPV infection? (more than one answer is possible)

A. Condom use

C. Late/delayed start of sex

B. Vaccination

7. Have you heard about the HPV vaccine in Ethiopia?

A. Yes

B. No

8. Can HPV infection be treated?

A. Yes

B. No

C. I don't know

9. Which one is/are the source of HPV vaccine information? (more than one answer is possible)

- A. School, College & University
- B. Healthcare provider
- C. Mass media (radio, TV, and newspaper)
- D. Friends & Family
- E. Internet

10. Do you need more information about HPV vaccination?

- A. Yes
- B. No

11. Who is/are the recipient of the HPV vaccine? (more than one answer is possible)

- A. Men only
- B. Women only
- C. Men and women

12. Does the human papillomavirus vaccine prevent cervical cancer?

- A. Yes
- B. No

13. Is the human papillomavirus vaccine used to prevent genital warts?

- A. Yes
- B. No

14. What age range is recommended for vaccination against human papillomavirus infection?

- A. 10-14 years
- B. I do not know

15. How many doses are recommended for a human papillomavirus vaccine?

- A. Two doses
- B. I don't know

16. Did you know the schedule for a human papillomavirus vaccination?

- A. 6 months -1 year
- B. I do not know

**PART III: Attitude evaluation questions (Strongly disagree, Disagree, Neutral, Agree, strongly agree)**

- 1. HPV vaccine is effective in preventing cervical cancer-----
- 2. I will take the vaccine because I feel at risk of getting an HPV infection-----
- 3. Person who has only one sexual partner can protect from HPV infection-----
- 4. It's not necessary to get the human papillomavirus vaccination-----
- 5. I believe the vaccine's side effects are reasonable and will not prevent me from receiving the vaccine-.....
- 6. I feel it is better to be vaccinated before becoming sexually active-----
- 7. More information on HPV and its vaccine will be needed before I take the vaccine-----
- 8. Human papillomavirus vaccine may have a long negative effect-----
- 9. I feel only sexually active ladies should get the vaccine-----
- 10. Do you think your family is allowed to vaccine-----?
- 11. Education on HPV vaccine should be implemented at college-----
- 12. HPV vaccination should be included in the National Program on Immunization -----
- 13. The vaccine is safe-----

14. The vaccine is useful to men-----

15. The vaccine is useful to women-----

**PART IV: Practice evaluation questions**

1. Have you ever tested for HPV?

A. Yes

B. No

2. If yes, were you informed of the result?

A. Yes

B. No

3. I am willing to undergo routine HPV testing if I can collect my samples myself

A. Yes

C. Not sure

B. No

4. I am willing to undergo routine HPV testing even if I am not allowed to collect my samples myself

A. Yes

C. Not sure

B. No

**THANKS FOR YOUR COOPERATION!!!!!!!!!!**
